# Supplementary material for: Distribution of Cenozoic plant relicts in China explained by drought in dry season
Source: PubMed Central journal article supplement (PMC4572930; doi:10.1038/srep14212), 2015-09-15
Supplement: srep14212-s1.pdf [file srep14212-s1.pdf]

## Supplementary Information

**Manuscript title:** Distribution of Cenozoic plant relicts in China explained by drought in dry season

**Author list:** Yongjiang Huang, Frédéric M.B. Jacques, Tao Su, David K. Ferguson, Hui Tang, Wenyun Chen & Zhekun Zhou \*

**Supplementary Table S1.** The Cenozoic relict genera considered in this study.

| Genus                 | Family            | Phenology      | Time of seed germination* |
|-----------------------|-------------------|----------------|---------------------------|
| <i>Amentotaxus</i>    | Taxaceae          | Evergreen      | April                     |
| <i>Amesiodendron</i>  | Sapindaceae       | Evergreen      | March to April            |
| <i>Apterosperma</i>   | Theaceae          | Evergreen      | Unknown                   |
| <i>Archiboehmeria</i> | Urticaceae        | Evergreen      | Unknown                   |
| <i>Bretschneidera</i> | Akeniaceae        | Deciduous      | Spring                    |
| <i>Camptotheca</i>    | Nyssaceae         | Deciduous      | March to April            |
| <i>Cathaya</i>        | Pinaceae          | Evergreen      | April to June             |
| <i>Cephalotaxus</i>   | Taxaceae          | Evergreen      | April                     |
| <i>Cercidiphyllum</i> | Cercidiphyllaceae | Deciduous      | Seed not dormant          |
| <i>Choerospondias</i> | Anacardiaceae     | Deciduous      | January to March          |
| <i>Corylopsis</i>     | Hamamelidaceae    | Deciduous      | December to January       |
| <i>Craigia</i>        | Malvaceae         | Deciduous      | Unknown                   |
| <i>Cryptomeria</i>    | Cupressaceae      | Evergreen      | Unknown                   |
| <i>Cunninghamia</i>   | Cupressaceae      | Evergreen      | Unknown                   |
| <i>Cyclocarya</i>     | Juglandaceae      | Deciduous      | Spring                    |
| <i>Davidia</i>        | Nyssaceae         | Deciduous      | March to April            |
| <i>Decaisnea</i>      | Lardizabalaceae   | Deciduous      | Unknown                   |
| <i>Dipelta</i>        | Caprifoliaceae    | Deciduous      | Unknown                   |
| <i>Diplopanax</i>     | Nyssaceae         | Evergreen      | Unknown                   |
| <i>Dipteronia</i>     | Aceraceae         | Deciduous      | April                     |
| <i>Disanthus</i>      | Hamamelidaceae    | Deciduous      | Unknown                   |
| <i>Eucommia</i>       | Eucommiaceae      | Deciduous      | Winter and spring         |
| <i>Euptelea</i>       | Eupteleaceae      | Deciduous      | April to May              |
| <i>Eurycorymbus</i>   | Sapindaceae       | Deciduous      | Seed not dormant          |
| <i>Euryodendron</i>   | Pentaphylacaceae  | Evergreen      | Unknown                   |
| <i>Euscaphis</i>      | Staphyleaceae     | Deciduous      | March to April            |
| <i>Fortunearia</i>    | Hamamelidaceae    | Deciduous      | April                     |
| <i>Glyptostrobus</i>  | Cupressaceae      | Semi-evergreen | Unknown                   |
| <i>Hemiptelea</i>     | Ulmaceae          | Deciduous      | May                       |
| <i>Heptacodium</i>    | Caprifoliaceae    | Deciduous      | Unknown                   |
| <i>Hovenia</i>        | Rhamnaceae        | Deciduous      | March to April            |
| <i>Idesia</i>         | Flacourtiaceae    | Deciduous      | Unknown                   |
| <i>Keteleeria</i>     | Pinaceae          | Evergreen      | Seed not dormant          |
| <i>Koelreuteria</i>   | Sapindaceae       | Deciduous      | Unknown                   |
| <i>Kolkwitzia</i>     | Caprifoliaceae    | Deciduous      | Unknown                   |
| <i>Malaria</i>        | Ximeniaceae       | Evergreen      | Unknown                   |
| <i>Meliiodendron</i>  | Styracaceae       | Deciduous      | Unknown                   |
| <i>Metasequoia</i>    | Taxodiaceae       | Deciduous      | Seed not dormant          |
| <i>Monimopetalum</i>  | Celastraceae      | Deciduous      | Spring                    |
| <i>Ostryopsis</i>     | Betulaceae        | Deciduous      | Unknown                   |
| <i>Parapyrenaria</i>  | Theaceae          | Evergreen      | Unknown                   |
| <i>Paulownia</i>      | Paulowniaceae     | Deciduous      | March to April            |

|                        |                 |                        |                 |
|------------------------|-----------------|------------------------|-----------------|
| <i>Phellodendron</i>   | Rutaceae        | Deciduous              | Unknown         |
| <i>Platycarya</i>      | Juglandaceae    | Deciduous              | April to May    |
| <i>Poliothyrsis</i>    | Salicaceae      | Deciduous              | Unknown         |
| <i>Poncirus</i>        | Rutaceae        | Semi-evergreen         | April to May    |
| <i>Pseudolarix</i>     | Pinaceae        | Deciduous              | March to April  |
| <i>Pseudotaxus</i>     | Taxaceae        | Evergreen              | Unknown         |
| <i>Pteroceltis</i>     | Ulmaceae        | Deciduous              | Spring          |
| <i>Pterostyrax</i>     | Styracaceae     | Deciduous              | Unknown         |
| <i>Schizophragma</i>   | Hydrangeaceae   | Deciduous              | Unknown         |
| <i>Semiliquidambar</i> | Altingiaceae    | Deciduous or evergreen | Unknown         |
| <i>Sinofranchetia</i>  | Lardizabalaceae | Deciduous              | Unknown         |
| <i>Sinojackia</i>      | Styracaceae     | Deciduous              | Spring          |
| <i>Sinopanax</i>       | Araliaceae      | Evergreen              | Unknown         |
| <i>Sinowilsonia</i>    | Hamamelidaceae  | Deciduous              | Unknown         |
| <i>Taiwania</i>        | Cupressaceae    | Evergreen              | Unknown         |
| <i>Tapiscia</i>        | Tapisciaceae    | Deciduous              | March to April  |
| <i>Tetracentron</i>    | Tetracentron    | Evergreen              | May             |
| <i>Tetrapanax</i>      | Araliaceae      | Evergreen              | March to August |
| <i>Tetrathyrium</i>    | Hamamelidaceae  | Evergreen              | Unknown         |
| <i>Thujiopsis</i>      | Cupressaceae    | Evergreen              | March to May    |
| <i>Toricellia</i>      | Toricelliaceae  | Deciduous              | Unknown         |
| <i>Tripterygium</i>    | Celastraceae    | Deciduous              | Unknown         |
| <i>Weigela</i>         | Caprifoliaceae  | Deciduous              | Unknown         |

\* Information of seed germination is based on “Seeds of Woody Plants in China”<sup>1</sup>.

### Related reference

1. National Service Center for State-Owned Forest Farms and Forestry Seed Seedling Affairs of the Forestry Administration. Seeds of woody plants in China. (Chinese Forestry Publishing House, Beijing, 2003).

**Supplementary Table S2.** Percentage contribution of each climatic parameter to explain the geographic distribution.

| Genus                 | Bio4<br>(°C) | Bio7<br>(°C) | CMMT<br>(°C) | Pautumn<br>(mm) | Pspring<br>(mm) | Psummer<br>(mm) | Pwinter<br>(mm) |
|-----------------------|--------------|--------------|--------------|-----------------|-----------------|-----------------|-----------------|
| <i>Amentotaxus</i>    | 17.8         | 51           | 17.3         | 1.4             | 10.5            | 1.8             | 0.1             |
| <i>Amesiodendron</i>  | 1.8          | 33.8         | 40.8         | 0.4             | 14.8            | 6.5             | 1.9             |
| <i>Apterosperma</i>   | 2.8          | 3.4          | 25.8         | 1.1             | 62.8            | 3.1             | 1               |
| <i>Archiboehmeria</i> | 2.8          | 17           | 47.8         | 15.1            | 14.1            | 1               | 2.2             |
| <i>Bretschneidera</i> | 17.4         | 1.6          | 0.7          | 0.7             | 79.1            | 0.3             | 0.3             |
| <i>Camptotheca</i>    | 10.7         | 6.7          | 4.1          | 23.2            | 33.5            | 19.2            | 2.6             |
| <i>Cathaya</i>        | 28.3         | 6.2          | 2.3          | 7               | 38.8            | 1               | 16.3            |
| <i>Cephalotaxus</i>   | 1.6          | 4            | 14.7         | 77.9            | 0.6             | 0.6             | 0.6             |
| <i>Cercidiphyllum</i> | 7.8          | 6.4          | 11.2         | 40.1            | 18.4            | 2.2             | 13.8            |
| <i>Choerospondias</i> | 2.5          | 53.9         | 32.4         | 1.8             | 2               | 0.7             | 6.8             |
| <i>Corylopsis</i>     | 12.9         | 34.5         | 3.6          | 44.2            | 0.9             | 3.9             | 0.1             |
| <i>Craigia</i>        | 3.8          | 34.2         | 17.1         | 2               | 26.7            | 3.9             | 12.3            |
| <i>Cryptomeria</i>    | 1.3          | 23.7         | 2.3          | 63.5            | 1.7             | 1.1             | 6.4             |
| <i>Cunninghamia</i>   | 3.4          | 33.1         | 2            | 53              | 4.3             | 1               | 3.2             |
| <i>Cyclocarya</i>     | 3.1          | 10.2         | 3.2          | 3.5             | 70.5            | 9               | 0.6             |
| <i>Davidia</i>        | 15.4         | 17.2         | 13.7         | 30.5            | 11.4            | 0.6             | 11.2            |
| <i>Decaisnea</i>      | 16.3         | 29.1         | 5.6          | 34.7            | 0.8             | 1.4             | 12.1            |
| <i>Dipelta</i>        | 12.1         | 28.6         | 13.1         | 24.7            | 1.8             | 0.3             | 19.4            |
| <i>Diplopanax</i>     | 12.4         | 28.9         | 2.6          | 4.6             | 41              | 5               | 5.6             |
| <i>Dipteronia</i>     | 5.3          | 7.3          | 16.2         | 59.6            | 0.7             | 0.7             | 10.1            |

|                        |      |      |      |      |      |      |      |
|------------------------|------|------|------|------|------|------|------|
| <i>Disanthus</i>       | 11.8 | 21.1 | 8    | 7.2  | 21.5 | 0.9  | 29.5 |
| <i>Eucommia</i>        | 6.8  | 12.2 | 4.1  | 47.7 | 19.3 | 3.8  | 6.1  |
| <i>Euptelea</i>        | 2.5  | 4.5  | 11.8 | 24.3 | 42.7 | 0.5  | 13.8 |
| <i>Eurycorymbus</i>    | 14.3 | 17.2 | 1.9  | 1.2  | 54   | 0.3  | 11.1 |
| <i>Euryodendron</i>    | 1    | 2.4  | 21.9 | 1.3  | 66.9 | 6.2  | 0.2  |
| <i>Euscaphis</i>       | 2.7  | 7.7  | 21.1 | 65.3 | 2.2  | 0.9  | 0.2  |
| <i>Fortunearia</i>     | 14.7 | 1.4  | 30.2 | 23.6 | 28.5 | 0.9  | 0.8  |
| <i>Glyptostrobus</i>   | 15.9 | 23.6 | 1.7  | 6    | 31.5 | 9.3  | 11.9 |
| <i>Hemiptelea</i>      | 17.5 | 9.4  | 26.3 | 3.3  | 2.6  | 25.7 | 15.2 |
| <i>Heptacodium</i>     | 10.5 | 1.6  | 3.2  | 51.8 | 6    | 6.4  | 20.5 |
| <i>Hovenia</i>         | 3    | 6.8  | 63.9 | 15.5 | 1.9  | 8.9  | 0.1  |
| <i>Idesia</i>          | 1.7  | 21.1 | 2.3  | 13.2 | 51.2 | 10.2 | 0.4  |
| <i>Keteleeria</i>      | 4.3  | 29.8 | 1.2  | 57.8 | 2.9  | 3.3  | 0.8  |
| <i>Koelreuteria</i>    | 1.3  | 3.1  | 31.7 | 22.7 | 11.6 | 26.7 | 3    |
| <i>Kolkwitzia</i>      | 22.2 | 1.7  | 38.3 | 30.4 | 0.7  | 3.4  | 3.3  |
| <i>Malania</i>         | 11.1 | 36.3 | 17.3 | 7    | 28.1 | 0.3  | 0    |
| <i>Melliodendron</i>   | 15.3 | 18.3 | 13.2 | 4.8  | 30.4 | 0.5  | 17.6 |
| <i>Metasequoia</i>     | 7.8  | 0.1  | 2.5  | 35.7 | 45.4 | 0.5  | 7.9  |
| <i>Monimopetalum</i>   | 11.7 | 9.8  | 3    | 4.5  | 20.7 | 2    | 48.3 |
| <i>Ostryopsis</i>      | 8.7  | 12.2 | 12.9 | 31   | 9.8  | 1.8  | 23.7 |
| <i>Parapyrenaria</i>   | 6.5  | 4.9  | 80.8 | 6    | 0.1  | 1.2  | 0.4  |
| <i>Paulownia</i>       | 5.2  | 5.1  | 14   | 73   | 0.9  | 1.5  | 0.3  |
| <i>Phellodendron</i>   | 18.1 | 6.8  | 4.7  | 8.7  | 1.7  | 57.9 | 2    |
| <i>Platycarya</i>      | 6.6  | 0.6  | 24.7 | 60.8 | 5.5  | 0.8  | 1    |
| <i>Poliothyrsis</i>    | 7    | 0.8  | 11.2 | 25.1 | 44.9 | 7.1  | 4    |
| <i>Poncirus</i>        | 14.2 | 0.5  | 41.9 | 3.1  | 27.6 | 1.1  | 11.7 |
| <i>Pseudolarix</i>     | 6.7  | 1.6  | 35.5 | 0.9  | 36.5 | 15.3 | 3.5  |
| <i>Pseudotaxus</i>     | 19.7 | 1.4  | 1.2  | 0.9  | 52.7 | 4.9  | 19.1 |
| <i>Pteroceltis</i>     | 12.5 | 7.3  | 12.5 | 20   | 25   | 18.8 | 3.8  |
| <i>Pterostyrax</i>     | 10   | 23.8 | 2    | 0.3  | 62.4 | 0.7  | 0.8  |
| <i>Schizophragma</i>   | 5.5  | 3.4  | 5.7  | 39.3 | 29.1 | 16.9 | 0.2  |
| <i>Semiliquidambar</i> | 9.4  | 22.1 | 22.7 | 1.1  | 24.5 | 7.4  | 12.9 |
| <i>Sinofranchetia</i>  | 3.4  | 11.3 | 17.1 | 35.9 | 21.8 | 1.9  | 8.5  |
| <i>Sinojackia</i>      | 7.3  | 31.5 | 1.9  | 29.5 | 6.9  | 10.1 | 12.9 |
| <i>Sinopanax</i>       | 14.4 | 69.1 | 0.3  | 0.3  | 7.6  | 6.8  | 1.4  |
| <i>Sinowilsonia</i>    | 13.6 | 2.4  | 49.4 | 10.4 | 16.6 | 0.3  | 7.3  |
| <i>Taiwania</i>        | 19.6 | 32.6 | 7.6  | 8.6  | 16.5 | 0.1  | 14.9 |
| <i>Tapiscia</i>        | 5    | 23.5 | 8.8  | 55.2 | 4.8  | 1.2  | 1.6  |
| <i>Tetracentron</i>    | 26.5 | 47.6 | 9.1  | 1    | 1.7  | 6.6  | 7.6  |
| <i>Tetrapanax</i>      | 12.1 | 28.7 | 7    | 34.3 | 5.1  | 4.8  | 8    |
| <i>Tetrathyrium</i>    | 7.3  | 6.6  | 47.4 | 0.1  | 0    | 5.4  | 33.2 |
| <i>Thujopsis</i>       | 12.8 | 13   | 16.8 | 4.9  | 6.6  | 11.2 | 34.8 |
| <i>Toricellia</i>      | 10.7 | 31.6 | 10.8 | 28.4 | 6.8  | 1.6  | 10.1 |
| <i>Trypterygium</i>    | 8.8  | 2    | 1.1  | 6.8  | 35.2 | 43.7 | 2.4  |
| <i>Weigela</i>         | 33.9 | 2.7  | 1.7  | 2.2  | 18.6 | 40.8 | 0.1  |

**Supplementary Table S3.** Permutation importance of each climatic parameter to explain the geographic distribution.

| Genus                 | Bio4<br>(°C) | Bio7<br>(°C) | CMMT<br>(°C) | Pautumn<br>(mm) | Pspring<br>(mm) | Psummer<br>(mm) | Pwinter<br>(mm) |
|-----------------------|--------------|--------------|--------------|-----------------|-----------------|-----------------|-----------------|
| <i>Amentotaxus</i>    | 38.6         | 5.4          | 17.7         | 6.4             | 22.2            | 8.8             | 0.9             |
| <i>Amesiodendron</i>  | 2.5          | 20.7         | 32.9         | 0.7             | 29.7            | 1.6             | 11.9            |
| <i>Apterosperma</i>   | 12.2         | 23.4         | 3.5          | 6.4             | 50.2            | 2.9             | 1.4             |
| <i>Archiboehmeria</i> | 3.6          | 10.9         | 60.4         | 8.8             | 12.4            | 0.6             | 3.3             |
| <i>Bretschneidera</i> | 15.4         | 3.7          | 2.1          | 1.6             | 72.7            | 3.5             | 1.1             |

|                        |      |      |      |      |      |      |      |
|------------------------|------|------|------|------|------|------|------|
| <i>Camptotheca</i>     | 17.5 | 3.2  | 4.5  | 6.4  | 12   | 46   | 10.4 |
| <i>Cathaya</i>         | 42.7 | 6.3  | 3.3  | 2.4  | 14.9 | 0.8  | 29.7 |
| <i>Cephalotaxus</i>    | 9.9  | 4.8  | 20.5 | 35.4 | 14.6 | 7.9  | 6.9  |
| <i>Cercidiphyllum</i>  | 7.9  | 2.9  | 6.7  | 62   | 8.4  | 8.4  | 3.8  |
| <i>Choerospondias</i>  | 17.2 | 24.1 | 17.2 | 6.1  | 22.1 | 6.1  | 7.2  |
| <i>Corylopsis</i>      | 33.6 | 9.7  | 13.2 | 13.8 | 11   | 13.8 | 4.8  |
| <i>Craigia</i>         | 1.2  | 18.9 | 11.1 | 1.4  | 40.5 | 4.5  | 22.4 |
| <i>Cryptomeria</i>     | 9.3  | 37.3 | 7.5  | 16.3 | 5.6  | 11.7 | 12.4 |
| <i>Cunninghamia</i>    | 13.1 | 21.6 | 9.8  | 10.9 | 22.5 | 10.6 | 11.6 |
| <i>Cyclocarya</i>      | 7.9  | 25.1 | 4.8  | 7.6  | 35.5 | 18.3 | 0.8  |
| <i>Davidia</i>         | 26   | 8.4  | 19.4 | 5.5  | 11.4 | 7.7  | 21.6 |
| <i>Decaisnea</i>       | 7.1  | 8.2  | 4.8  | 65.9 | 0.7  | 10.1 | 3.2  |
| <i>Dipelta</i>         | 2.7  | 12.6 | 27.8 | 11.7 | 5.8  | 2.8  | 12.2 |
| <i>Diplopanax</i>      | 36.9 | 3.4  | 7.9  | 10.7 | 24.7 | 8.2  | 8.3  |
| <i>Dipteronia</i>      | 4.6  | 4.3  | 12.3 | 66   | 1.2  | 2.3  | 9.3  |
| <i>Disanthus</i>       | 15   | 3.4  | 18.2 | 7.4  | 12.5 | 6.1  | 37.4 |
| <i>Eucommia</i>        | 12.9 | 13   | 6.4  | 40.1 | 4.9  | 7.1  | 15.6 |
| <i>Euptelea</i>        | 12.1 | 2.2  | 18.5 | 29.7 | 24.8 | 5.6  | 7    |
| <i>Eurycorymbus</i>    | 27.1 | 3.8  | 9.5  | 3.3  | 18.2 | 6.5  | 31.7 |
| <i>Euryodendron</i>    | 0.1  | 26.3 | 3.9  | 5.9  | 57.1 | 6.6  | 0.1  |
| <i>Euscaphis</i>       | 21.1 | 14.6 | 26.5 | 13.4 | 9.5  | 11.8 | 3    |
| <i>Fortunearia</i>     | 6.7  | 7.1  | 13.7 | 59.1 | 6.3  | 1.7  | 5.4  |
| <i>Glyptostrobus</i>   | 10.6 | 30.1 | 2.3  | 15.5 | 18   | 6    | 17.4 |
| <i>Hemiptelea</i>      | 19.9 | 1.5  | 29.6 | 2.5  | 8.5  | 11.7 | 26.3 |
| <i>Heptacodium</i>     | 3.1  | 1.6  | 8.3  | 44.3 | 3.8  | 0.3  | 38.6 |
| <i>Hovenia</i>         | 9.4  | 13.6 | 34.7 | 1.5  | 24.5 | 10.2 | 6.2  |
| <i>Idesia</i>          | 19.1 | 5.3  | 8.6  | 5.6  | 37.5 | 18.1 | 5.8  |
| <i>Keteleeria</i>      | 10.9 | 15   | 6.6  | 41.2 | 6.3  | 14.2 | 5.8  |
| <i>Koelreuteria</i>    | 5.7  | 7.1  | 21.1 | 12.3 | 26.3 | 14.1 | 13.5 |
| <i>Kolkwitzia</i>      | 37.8 | 16.7 | 15.3 | 8.6  | 6.8  | 1.3  | 13.5 |
| <i>Malania</i>         | 8.5  | 3    | 12.1 | 10.3 | 65.3 | 0.7  | 0    |
| <i>Melliodendron</i>   | 22.4 | 23.2 | 2    | 5.6  | 13   | 1.3  | 32.6 |
| <i>Metasequoia</i>     | 1.8  | 2.8  | 0.3  | 28.9 | 57.1 | 0.6  | 8.6  |
| <i>Monimopetalum</i>   | 0.7  | 1.6  | 6    | 3.5  | 87   | 0.3  | 0.7  |
| <i>Ostryopsis</i>      | 12.9 | 10.1 | 18.5 | 18.4 | 12.6 | 4.3  | 23.2 |
| <i>Parapyrenaria</i>   | 0    | 54.4 | 43.8 | 0.3  | 0.4  | 0.2  | 0.9  |
| <i>Paulownia</i>       | 14   | 7.4  | 19.4 | 32.3 | 10.2 | 9.3  | 7.4  |
| <i>Phellodendron</i>   | 27.8 | 8.5  | 2.5  | 7.2  | 3.2  | 49.3 | 1.5  |
| <i>Platycarya</i>      | 17.1 | 3.4  | 30.8 | 14.7 | 15.1 | 11.5 | 7.6  |
| <i>Poliothyrsis</i>    | 10   | 6.1  | 11.9 | 59.2 | 4.7  | 5.3  | 2.9  |
| <i>Poncirus</i>        | 14.7 | 1    | 17.3 | 11.8 | 5.2  | 4.8  | 45.1 |
| <i>Pseudolarix</i>     | 9.3  | 1.8  | 8.2  | 5.7  | 15.3 | 42.7 | 17   |
| <i>Pseudotaxus</i>     | 36.8 | 0.8  | 2.1  | 4.3  | 5.6  | 30.3 | 20.2 |
| <i>Pteroceltis</i>     | 21.6 | 6.5  | 11.2 | 13.2 | 5.4  | 33.1 | 8.9  |
| <i>Pterostyrax</i>     | 20.3 | 8.6  | 8.3  | 4.7  | 48.6 | 0.5  | 9    |
| <i>Schizophragma</i>   | 24.4 | 12.1 | 9.1  | 3.5  | 22.8 | 27.1 | 1.1  |
| <i>Semiliquidambar</i> | 29   | 12.2 | 15.7 | 3.7  | 26.7 | 5.2  | 7.6  |
| <i>Sinofranchetia</i>  | 1.8  | 5.5  | 4.2  | 69.2 | 4.5  | 11.3 | 3.5  |
| <i>Sinojackia</i>      | 11.3 | 22.3 | 3.8  | 4.3  | 47.1 | 1.9  | 9.4  |
| <i>Sinopanax</i>       | 0    | 98.6 | 0.3  | 0.2  | 0.1  | 0    | 0.6  |
| <i>Sinowilsonia</i>    | 50.7 | 15.1 | 21.9 | 4.6  | 1.4  | 0.2  | 6.1  |
| <i>Taiwania</i>        | 50.3 | 6.5  | 7.7  | 0.5  | 3.1  | 1.3  | 30.5 |
| <i>Tapiscia</i>        | 25.9 | 10.1 | 17.2 | 6.3  | 24.5 | 2.5  | 13.5 |
| <i>Tetracentron</i>    | 26   | 23.4 | 14.5 | 0.9  | 10.5 | 14.5 | 10.1 |
| <i>Tetrapanax</i>      | 19.1 | 2.2  | 12.8 | 5.6  | 19.8 | 24.6 | 16   |
| <i>Tetrathyrium</i>    | 1.9  | 0    | 92   | 0    | 0    | 0.2  | 5.9  |
| <i>Thujopsis</i>       | 19.9 | 22.1 | 27   | 4.7  | 2.5  | 7.7  | 16.2 |

|                     |      |     |      |      |      |      |      |
|---------------------|------|-----|------|------|------|------|------|
| <i>Toricellia</i>   | 19.3 | 9.9 | 13.9 | 15.6 | 13.2 | 16.5 | 11.6 |
| <i>Trypterygium</i> | 20.3 | 7.4 | 8.7  | 13.2 | 36.1 | 11.9 | 2.5  |
| <i>Weigela</i>      | 30   | 3.2 | 8.1  | 5.6  | 28.2 | 24.6 | 0.3  |

**Supplementary Table S4.** Number of times each parameter best explains the geographic distribution of relict genera in China.

| Parameter | Percent contribution | Permutation importance |
|-----------|----------------------|------------------------|
| Bio4      | 0                    | 14                     |
| Bio7      | 10                   | 5                      |
| CMMT      | 11                   | 8                      |
| Pautumn   | 19                   | 12                     |
| Pspring   | 19                   | 15                     |
| Psummer   | 3                    | 6                      |
| Pwinter   | 3                    | 5                      |
